# Supplementary material for: Quantification of Fibronectin 1 (FN1) splice variants, including two novel ones, and analysis of integrins as candidate FN1 receptors in bovine preimplantation embryos
Source: PubMed Central journal article supplement (PMC2648952; doi:10.1186/1471-213x-9-1), 2009-01-06

Dilution serie EIIB-

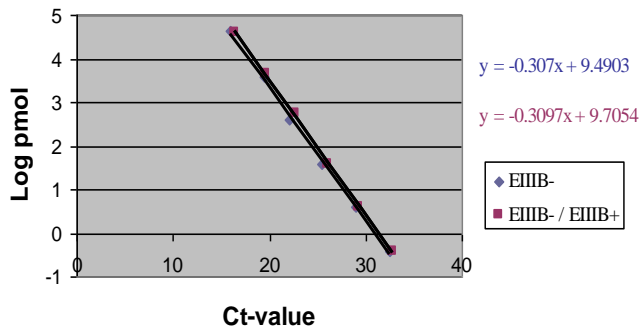

Dilution serie EIIB+

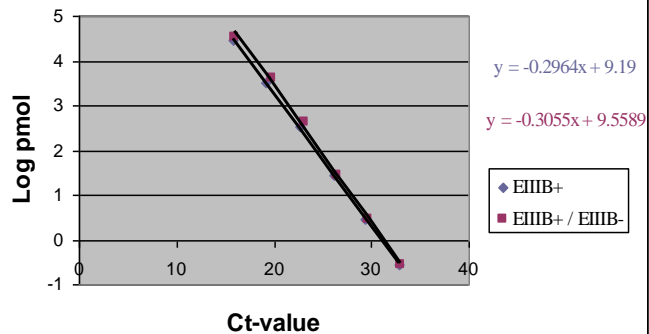

Dilution serie EIIA-

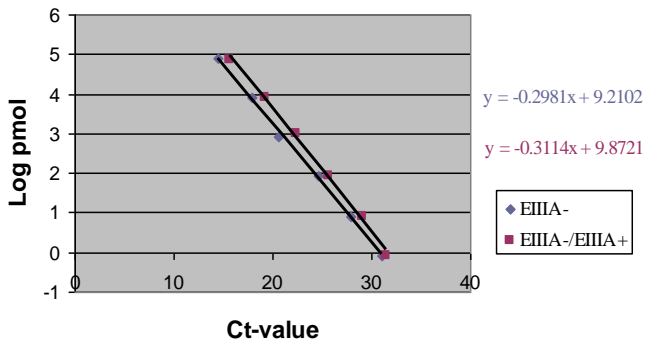

Dilution serie EIIA+

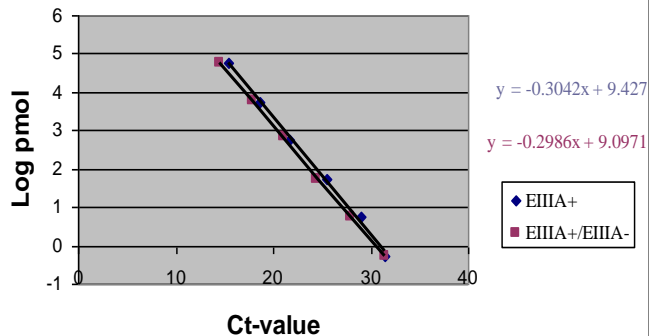

Dilution serie IIICS-

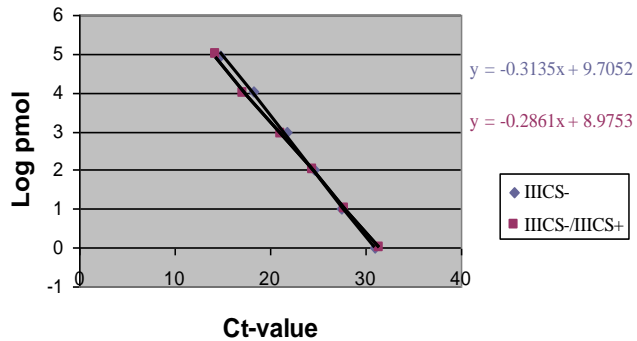

Dilution serie IIICS+

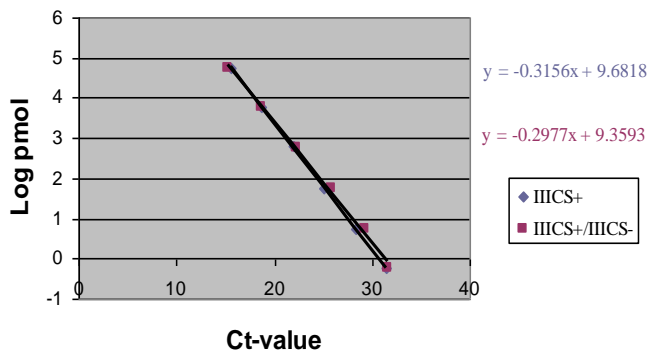

Supplement: 1471-213X-9-1-S1.pdf [file 1471-213X-9-1-S1.pdf]
