# Supplementary material for: Quantification of Fibronectin 1 (FN1) splice variants, including two novel ones, and analysis of integrins as candidate FN1 receptors in bovine preimplantation embryos
Source: PubMed Central journal article supplement (PMC2648952; doi:10.1186/1471-213x-9-1), 2009-01-06

### FN1

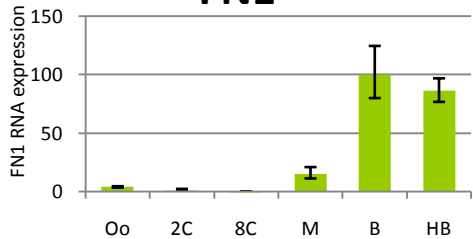

### ITGA2B

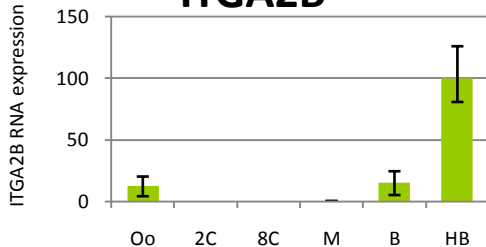

### ITGA3

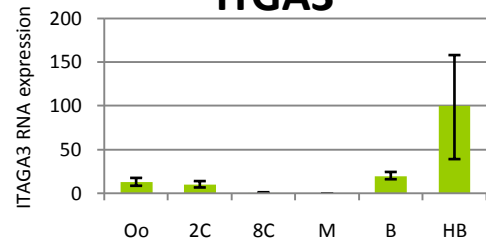

### ITGA4

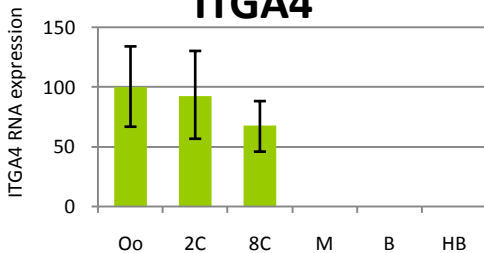

### ITGA5

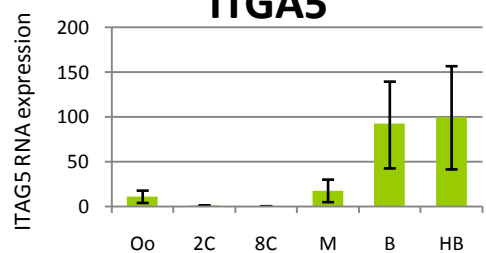

### ITGA8

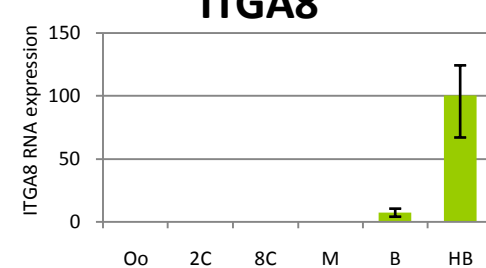

### ITGA9

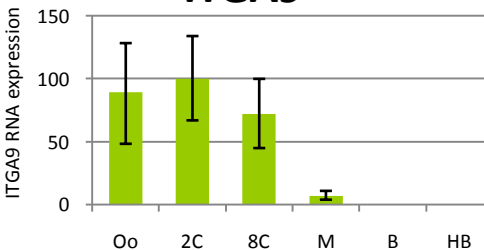

### ITGA11

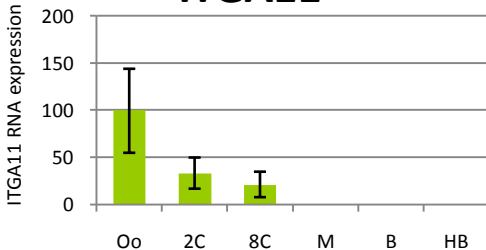

### ITGAV

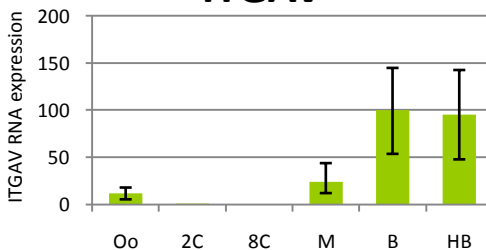

### ITGB1

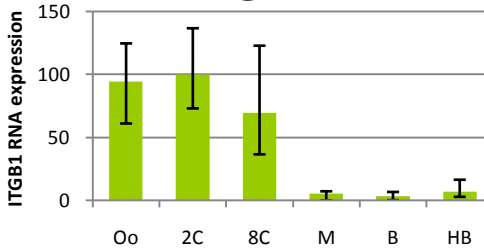

### ITGB3

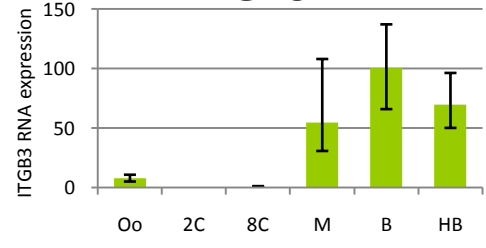

Supplement: 1471-213X-9-1-S3.pdf [file 1471-213X-9-1-S3.pdf]
